# Supplementary material for: Preparation of biodegradable poly(lactic acid)-b-polyamide 4 block poly(ester amide) and its electrospun fibers
Source: Royal Society of Chemistry journal article supplement (doi:10.1039/d6ra01092j), 2026-04-20
Supplement: d6ra01092j11.pdf [file d6ra01092j11.pdf]

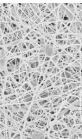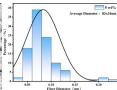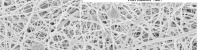

506010 3.0kV 11.3mm x10.0k SE(U)

5.00µm
