# Supplementary material for: Preparation of biodegradable poly(lactic acid)-b-polyamide 4 block poly(ester amide) and its electrospun fibers
Source: Royal Society of Chemistry journal article supplement (doi:10.1039/d6ra01092j), 2026-04-20
Supplement: d6ra01092j16.pdf [file d6ra01092j16.pdf]

## ***Supporting Information***

### **Preparation of Biodegradable Poly(lactic acid)-b-polyamide 4 Block**

#### **Poly(ester amide) and Its Electrospun Fibers**

Fan Mo<sup>1,2</sup>, Chen Tian<sup>1,2</sup>, Rongrong Ji<sup>1,2</sup>, Shixing Dong<sup>1,2</sup>, Linwei Liang<sup>1,2</sup>,

Ling Zhou<sup>1,2,3</sup>, Hao Wu<sup>1,2,3</sup>, Xipo Zhao<sup>1,2,3,\*</sup>

(1. Hubei Provincial Key Laboratory of Green Materials for Light Industry, Hubei University of Technology, Wuhan, Hubei 430068, P.R.China; 2. New Materials and Green Manufacturing Talent Introduction and Innovation Demonstration Base, Hubei University of Technology, Wuhan, Hubei 430068, P.R.China; 3. Hubei Longzhong Laboratory, Xiangyang, Hubei 441000, P.R.China)

(Correspondence to: Xipo Zhao (E-mail: xpzhao123@163.com))

Correspondence author:

Xipo Zhao (e-mail: xpzhao123@163.com ,Tel.+8613871320654)

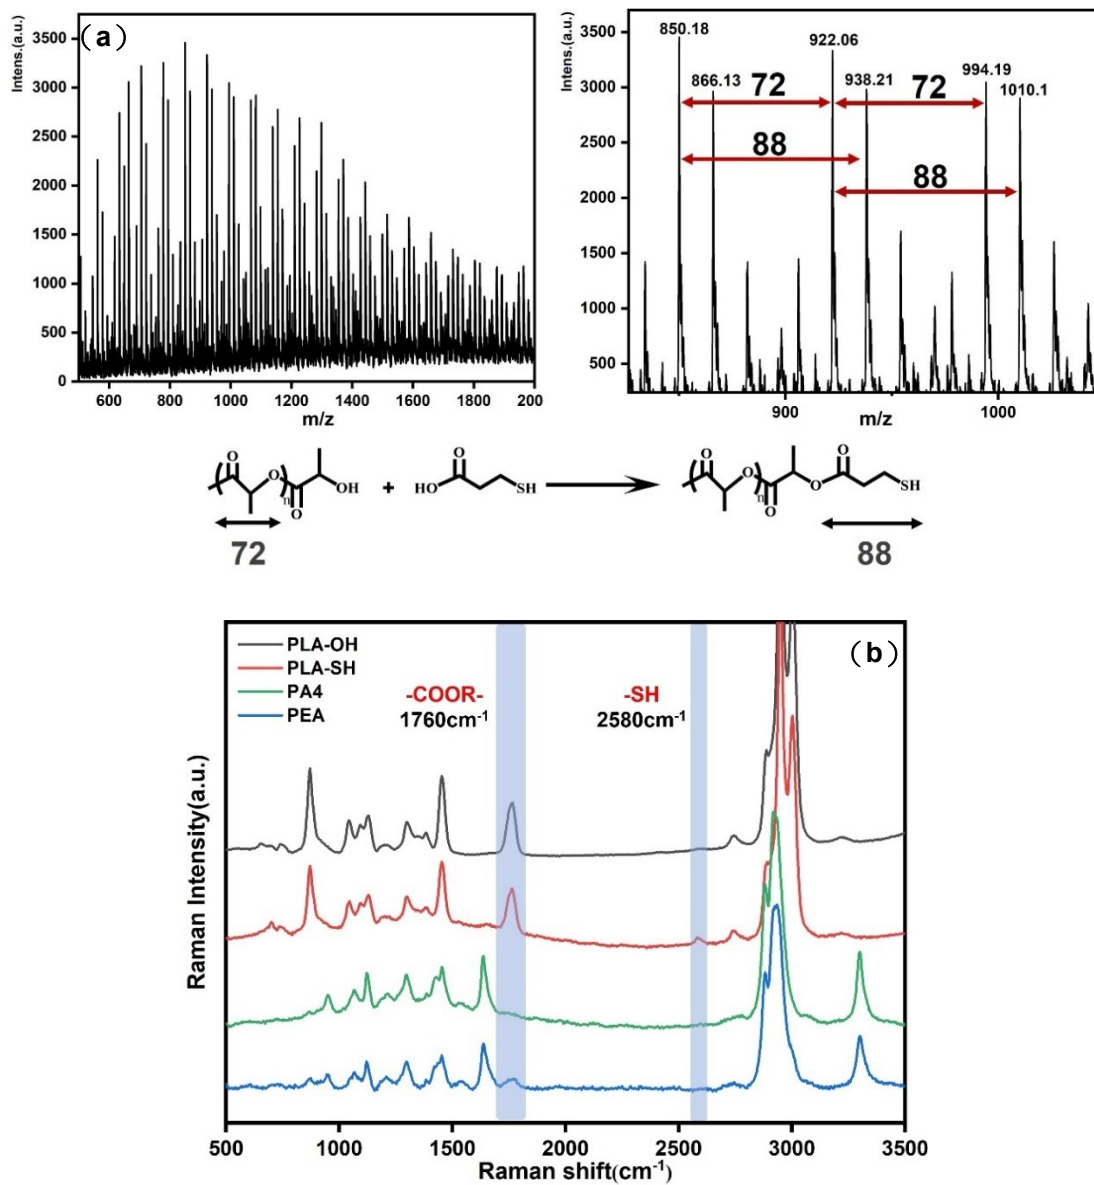

**Figure S1** Structural characterization of PLA, PLA-SH, and PEA: (a) MALDI-TOF MS spectrum of PLAL-SH, (b) Raman spectra

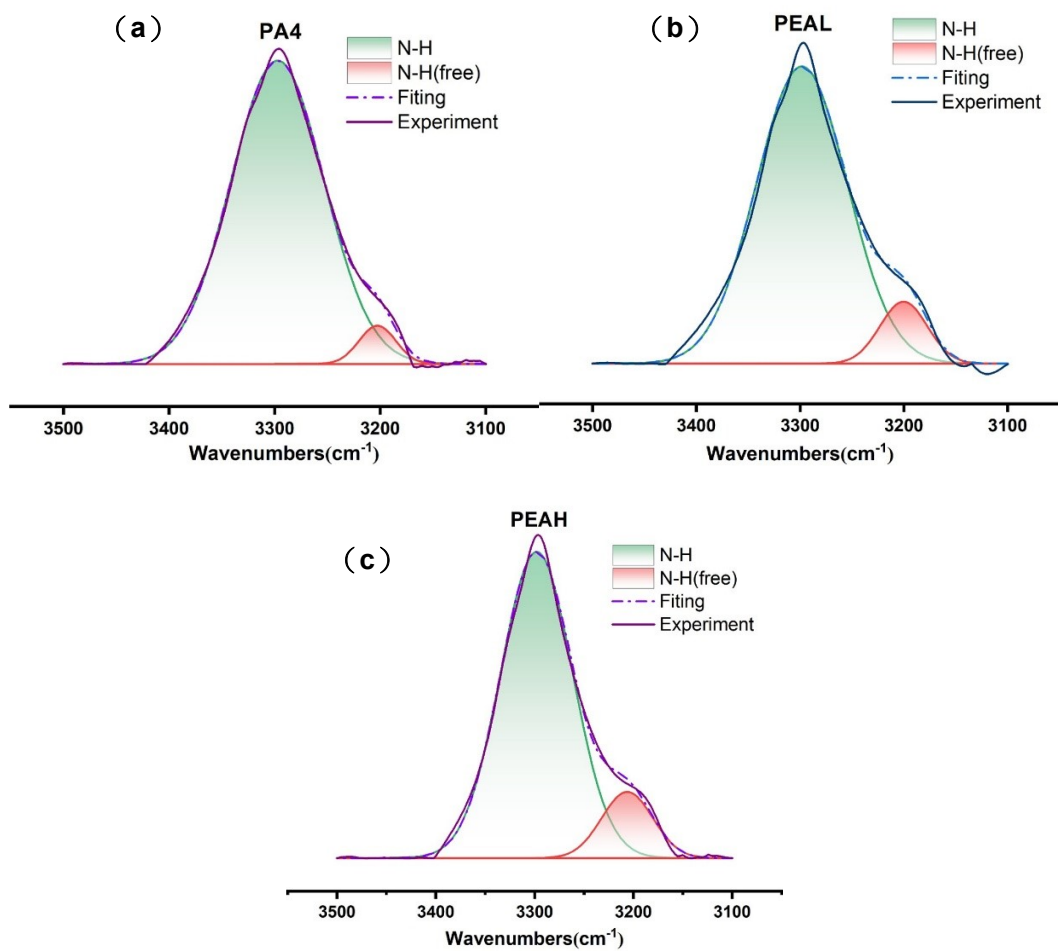

**Figure S2** Band fitting results of infrared absorption in the 3500–3100  $\text{cm}^{-1}$  region for (a) PA4, (b) PEAL, and (c) PEAH

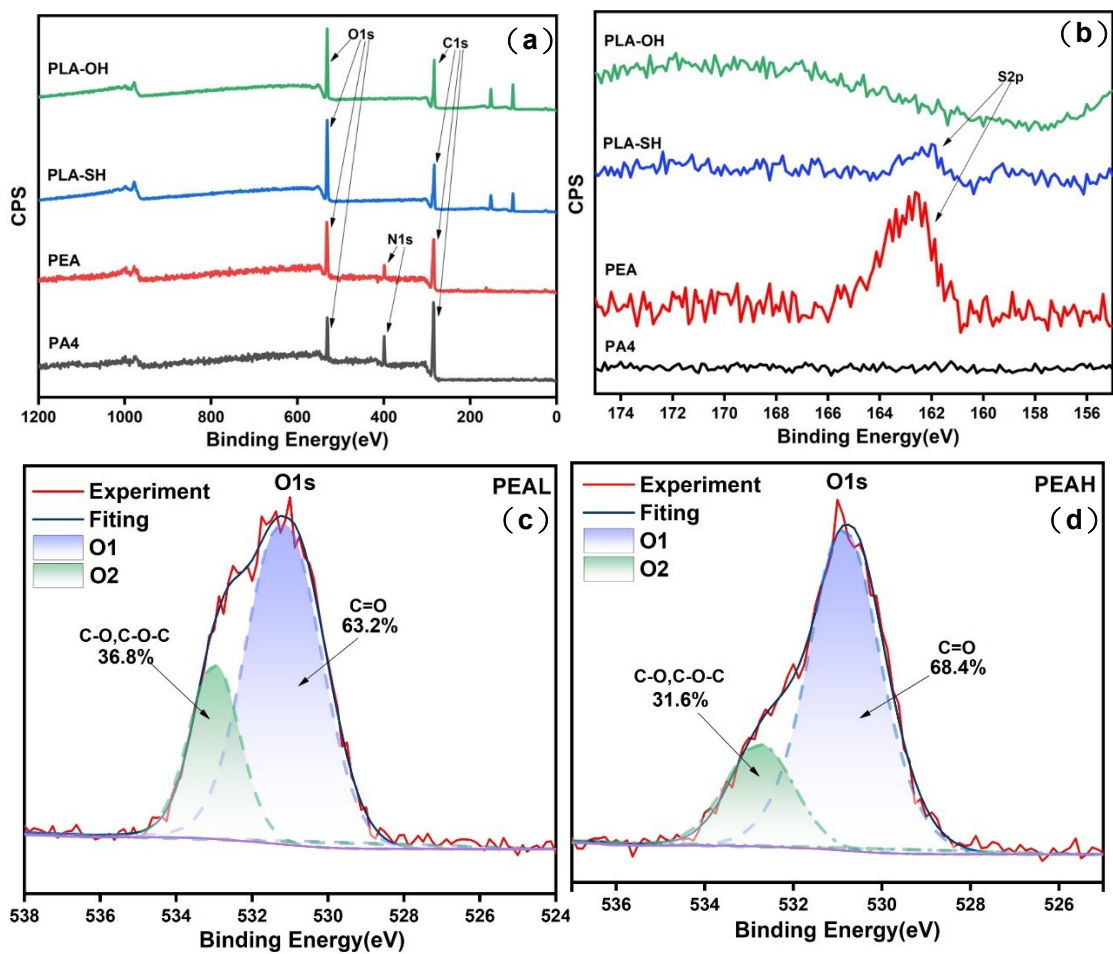

**Figure S3** Wide-scan XPS spectra of the polymers; (b) Enlarged view of the wide-scan XPS spectra in the binding energy range of 156–174 eV; (c) High-resolution O1s XPS spectrum of PEAL; (d) High-resolution O1s XPS spectrum of PEAH.

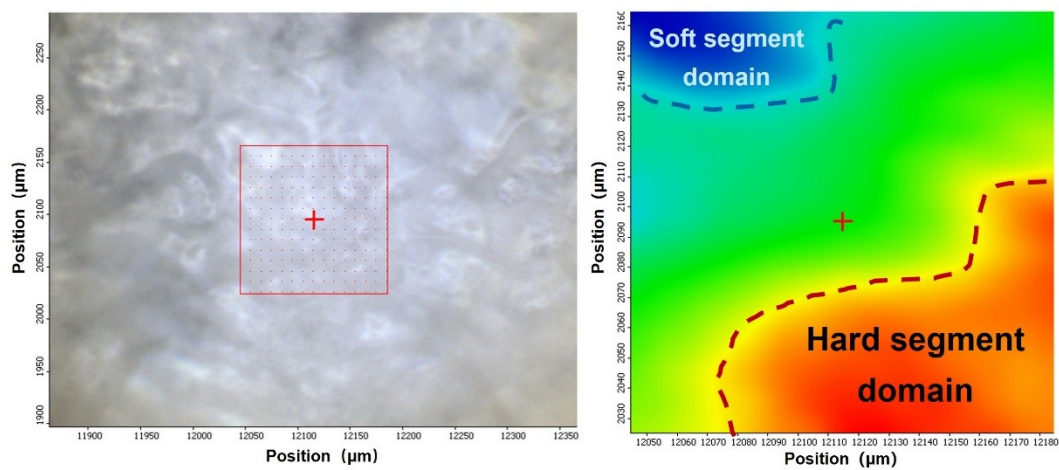

**Figure S4** Optical image of the PEAH sample (left) and the 2D infrared surface mapping intensity image at 1640 cm<sup>-1</sup> (right).

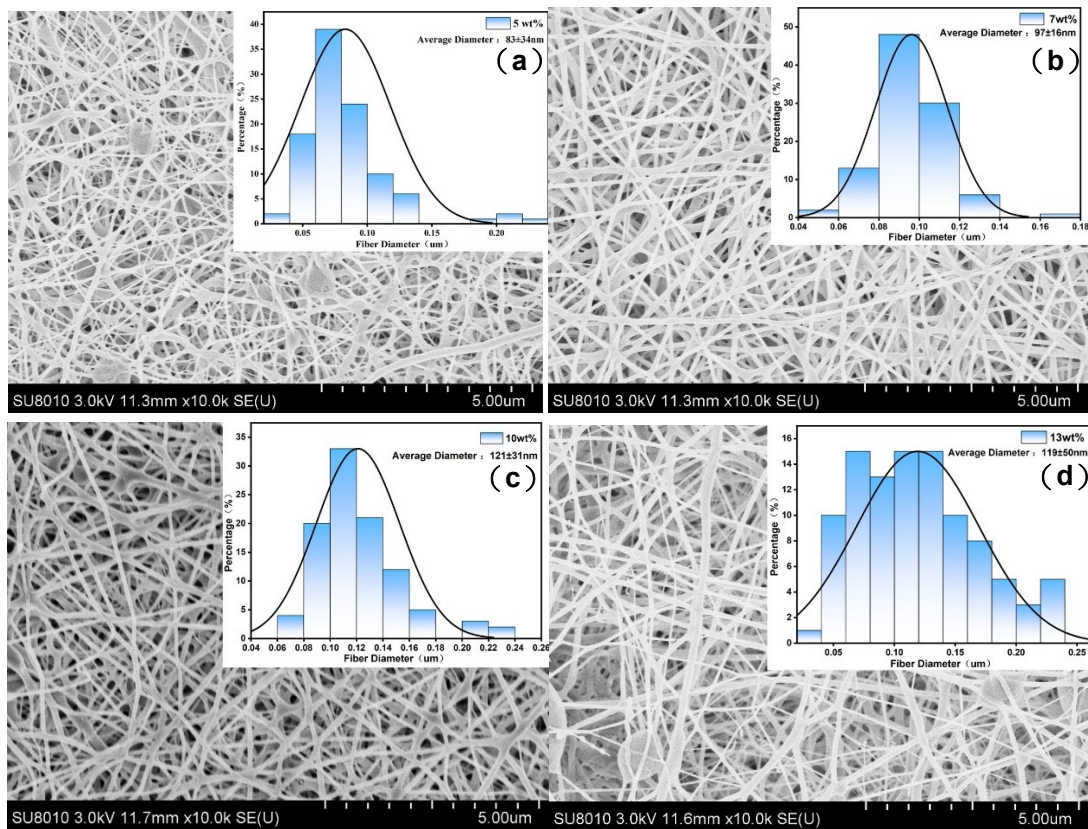

**Figure S5** (a) Scanning electron microscope image of the morphology of PA4 electrospun fibers at a solution concentration of 5 wt %; (b) 7 wt %; (c) 10 wt % and (d) 13 wt %

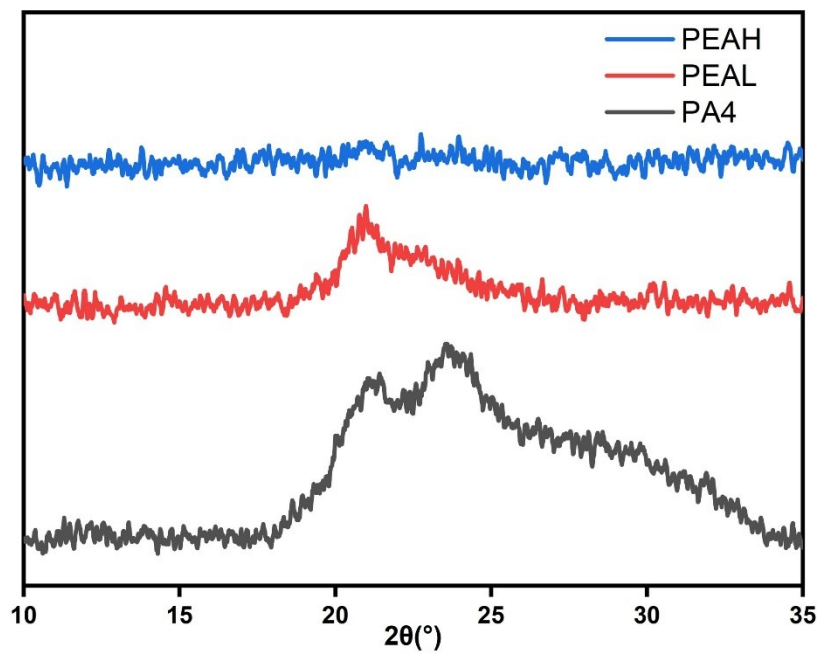

**Figure S6** XRD patterns of electrospun fiber membranes of PA4, PEAL, and PEAH.

**Table S1.** Band fitting data of PA4, PEAL, and PEAH in the infrared absorption range of 3500–3100  $\text{cm}^{-1}$

| <b>Sample</b> | <b>Type</b>  | <b>Area%</b> | <b><math>\sigma/\text{cm}^{-1}</math></b> |
|---------------|--------------|--------------|-------------------------------------------|
| PA4           | N-H          | 94.2         | 3297.2                                    |
|               | N-H ( free ) | 5.8          | 3202.5                                    |
| PEAL          | N-H          | 90.2         | 3298                                      |
|               | N-H ( free ) | 9.8          | 3203.2                                    |
| PEAH          | N-H          | 86.7         | 3298.3                                    |
|               | N-H ( free ) | 13.3         | 3206.2                                    |
